# Supplementary material for: Antimicrobial resistance and molecular genotyping of Salmonella enterica serovar Enteritidis clinical isolates from Guizhou province of Southwestern China
Source: PLoS One. 2019 Sep 23;14(9):e0221492. doi: 10.1371/journal.pone.0221492 (PMC6756847; doi:10.1371/journal.pone.0221492)
Supplement: S1 Table — (XLSX) [file pone.0221492.s001.xlsx]

## Sheet: Sheet1
Strain No.	Source city	Year of isolation	Serotype	Ampicillin		Amoxicillin/clavulanic acid		Ceftriaxone		Cefepime		Cefoxitin		Streptomycin		Gentamicin		Sulfamethoxazole		Trimethoprim /sulfamethoxazole		Nalidixic acid		Ciprofloxacine		Azithromycin		Imipenem		Doxycycline		Tetracycline		Chloramphenicol		MDR	Pulsotype (PT)	MLVA type (MT)	PT-MT genotype
SM201102	Guiyang	2011	S.Enteritidis	2	S	≤1/0.5	S	0.5	S	≤1	S	4	S	≤8	S	≤1	S	256	S	≤0.13/2.4	S	>32	R	0.25	I	≤2	S	≤0.5	S	4	S	≤2	S	16	I	1	13	6	22
SM201107	Guiyang	2011	S.Enteritidis	8	S	16/8	I	0.5	S	≤1	S	4	S	≤8	S	≤1	S	>512	R	≤0.13/2.4	S	32	R	≤0.03	S	≤2	S	0.5	S	4	S	8	I	8	S	2	27	5	53
SM201108	Guiyang	2011	S.Enteritidis	>32	R	16/8	I	≤0.25	S	≤1	S	≤1	S	>32	R	>32	R	>512	R	>4/76	R	>32	R	4	R	8	S	1	S	32	R	8	I	4	S	5	15	10	28
SM201111	Guiyang	2011	S.Enteritidis	>32	R	>32/16	R	≤0.25	S	4	I	4	S	>32	R	>32	R	>512	R	>4/76	R	>32	R	1	R	≤2	S	≤0.5	S	>32	R	>32	R	16	I	6	15	10	28
SM201112	Guiyang	2011	S.Enteritidis	>32	R	>32/16	R	≤0.25	S	≤1	S	2	S	>32	R	≤1	S	512	R	≤0.13/2.4	S	>32	R	0.25	I	4	S	≤0.5	S	8	I	4	S	16	I	5	22	3	48
SM201113	Guiyang	2011	S.Enteritidis	>32	R	>32/16	R	≤0.25	S	≤1	S	2	S	≤8	S	>32	R	128	S	≤0.13/2.4	S	>32	R	0.125	I	≤2	S	≤0.5	S	2	S	≤2	S	8	S	4	15	7	29
SM201115	Guiyang	2011	S.Enteritidis	>32	R	>32/16	R	≤0.25	S	≤1	S	2	S	>32	R	≤1	S	>512	R	0.25/4.75	S	>32	R	0.25	I	≤2	S	≤0.5	S	8	I	4	S	16	I	5	13	11	23
SM201201	Anshun	2012	S.Enteritidis	>32	R	>32/16	R	≤0.25	S	≤1	S	2	S	≤8	S	>32	R	512	R	≤0.13/2.4	S	>32	R	0.25	I	≤2	S	≤0.5	S	4	S	4	S	16	I	5	26	1	52
SM201202	Anshun	2012	S.Enteritidis	>32	R	>32/16	R	≤0.25	S	≤1	S	2	S	>32	R	≤1	S	>512	R	0.25/4.75	S	>32	R	0.125	I	≤2	S	≤0.5	S	2	S	4	S	16	I	5	31	15	57
SM201203	Qiandongnan	2012	S.Enteritidis	>32	R	>32/16	R	≤0.25	S	≤1	S	2	S	>32	R	≤1	S	512	R	0.25/4.75	S	>32	R	0.125	I	4	S	≤0.5	S	2	S	4	S	16	I	5	31	5	58
SM201301	Anshun	2013	S.Enteritidis	2	S	≤1/0.5	S	1	S	≤1	S	4	S	16	I	≤1	S	512	R	≤0.13/2.4	S	>32	R	0.25	I	≤2	S	≤0.5	S	4	S	4	S	8	S	2	13	5	24
SM201303	Anshun	2013	S.Enteritidis	>32	R	>32/16	R	≤0.25	S	≤1	S	2	S	>32	R	≤1	S	512	R	0.25/4.75	S	>32	R	0.125	I	4	S	≤1	S	2	S	4	S	16	I	5	18	5	33
SM201304	Anshun	2013	S.Enteritidis	>32	R	>32/16	R	≤0.25	S	≤1	S	4	S	>32	R	≤1	S	512	R	0.25/4.75	S	>32	R	0.125	I	4	S	≤0.5	S	2	S	4	S	16	I	5	18	20	34
SM201306	Anshun	2013	S.Enteritidis	>32	R	>32/16	R	≤0.25	S	≤1	S	2	S	>32	R	≤1	S	512	R	0.25/4.75	S	>32	R	0.125	I	4	S	≤0.5	S	2	S	≤2	S	16	I	5	18	5	33
SM201312	Guiyang	2013	S.Enteritidis	>32	R	>32/16	R	≤0.25	S	≤1	S	≤1	S	>32	R	≤1	S	>512	R	0.25/4.75	S	>32	R	0.125	I	≤2	S	≤0.5	S	2	S	≤2	S	8	S	5	18	20	34
SM201313	Guiyang	2013	S.Enteritidis	>32	R	>32/16	R	≤0.25	S	≤1	S	≤1	S	>32	R	≤1	S	>512	R	≤0.13/2.4	S	>32	R	0.125	I	≤2	S	≤0.5	S	2	S	4	S	8	S	5	20	26	42
SM201315	Guiyang	2013	S.Enteritidis	2	S	≤1/0.5	S	≤0.25	S	≤1	S	2	S	≤8	S	≤1	S	512	R	≤0.13/2.4	S	>32	R	0.125	I	4	S	≤0.5	S	4	S	8	I	16	I	2	19	5	38
SM201320	Guiyang	2013	S.Enteritidis	>32	R	>32/16	R	≤0.25	S	≤1	S	≤1	S	>32	R	≤1	S	>512	R	0.25/4.75	S	>32	R	0.125	I	4	S	0.5	S	2	S	4	S	8	S	5	18	6	35
SM201322	Guiyang	2013	S.Enteritidis	>32	R	>32/16	R	≤0.25	S	≤1	S	2	S	>32	R	≤1	S	>512	R	≤0.13/2.4	S	>32	R	0.125	I	≤2	S	≤0.5	S	2	S	4	S	8	S	5	13	5	24
SM201327	Guiyang	2013	S.Enteritidis	>32	R	>32/16	R	≤0.25	S	≤1	S	2	S	>32	R	≤1	S	>512	R	≤0.13/2.4	S	>32	R	0.125	I	≤2	S	≤0.5	S	2	S	4	S	8	S	5	13	3	25
SM201329	Guiyang	2013	S.Enteritidis	>32	R	>8/4	S	≤0.25	S	≤1	S	≤1	S	>32	R	≤1	S	>512	R	0.25/4.75	S	>32	R	0.25	I	4	S	≤0.5	S	2	S	≤2	S	4	S	4	13	5	24
SM201335	Zunyi	2013	S.Enteritidis	≤1	S	16/8	I	≤0.25	S	≤1	S	2	S	>32	R	≤1	S	>512	R	>4/76	R	>32	R	0.125	I	≤2	S	≤0.5	S	2	S	≤2	S	8	S	3	7	5	9
SM201339	Zunyi	2013	S.Enteritidis	>32	R	8/4	S	≤0.25	S	≤1	S	≤1	S	>32	R	≤1	S	>512	R	0.25/4.75	S	>32	R	0.25	I	4	S	≤0.5	S	32	R	>32	R	4	S	5	3	5	3
SM201340	Zunyi	2013	S.Enteritidis	≤1	S	≤1/0.5	S	≤0.25	S	≤1	S	≤1	S	≤8	S	≤1	S	≤16	S	≤0.13/2.4	S	>32	R	0.25	I	4	S	≤0.5	S	2	S	≤2	S	4	S	1	4	5	4
SM201402	Anshun	2014	S.Enteritidis	2	S	≤1/0.5	S	≤0.25	S	≤1	S	2	S	≤8	S	≤1	S	≤16	S	≤0.13/2.4	S	>32	R	0.125	I	8	S	≤0.5	S	2	S	4	S	8	S	1	19	5	38
SM201408	Anshun	2014	S.Enteritidis	>32	R	>32/16	R	≤0.25	S	≤1	S	2	S	>32	R	2	S	512	R	0.25/4.75	S	>32	R	0.125	I	4	S	≤0.5	S	4	S	4	S	16	I	5	20	5	43
SM201409	Anshun	2014	S.Enteritidis	2	S	≤2/1	S	≤0.25	S	≤1	S	2	S	≤8	S	≤1	S	≤16	S	≤0.13/2.4	S	>32	R	0.25	I	4	S	≤0.5	S	4	S	4	S	16	I	1	16	22	30
SM201415	Guiyang	2014	S.Enteritidis	>32	R	>32/16	R	≤0.25	S	≤1	S	2	S	>32	R	≤1	S	>512	R	0.25/4.75	S	>32	R	0.125	I	8	S	≤0.5	S	4	S	4	S	16	I	5	18	5	33
SM201416	Guiyang	2014	S.Enteritidis	>32	R	>32/16	R	>8	R	>32	R	2	S	≤8	S	≤1	S	32	S	≤0.13/2.4	S	>32	R	0.125	I	≤2	S	≤0.5	S	2	S	≤2	S	8	S	4	14	20	27
SM201419	Guiyang	2014	S.Enteritidis	4	S	4/2	S	≤0.25	S	≤1	S	2	S	>32	R	≤1	S	>512	R	0.25/4.75	S	>32	R	0.125	I	≤2	S	≤0.5	S	>32	R	16	R	16	I	4	1	21	1
SM201424	Guiyang	2014	S.Enteritidis	>32	R	>32/16	R	≤0.25	S	≤1	S	2	S	>32	R	≤1	S	>512	R	0.25/4.75	S	>32	R	0.125	I	4	S	≤0.5	S	2	S	4	S	16	I	5	2	8	2
SM201427	Qiandongnan	2014	S.Enteritidis	>32	R	>32/16	R	≤0.25	S	≤1	S	2	S	>32	R	≤1	S	>512	R	0.25/4.75	S	>32	R	0.125	I	4	S	≤0.5	S	>32	R	16	R	16	I	6	3	5	3
SM201432	Qiandongnan	2014	S.Enteritidis	2	S	≤1/0.5	S	≤0.25	S	≤1	S	2	S	16	I	≤1	S	512	R	≤0.13/2.4	S	>32	R	0.125	I	4	S	≤0.5	S	4	S	8	I	8	S	2	19	3	39
SM201433	Qianxinan	2014	S.Enteritidis	>32	R	>32/16	R	≤0.25	S	≤1	S	2	S	>32	R	≤1	S	>512	R	0.25/4.75	S	>32	R	0.125	I	4	S	≤0.5	S	>32	R	32	R	16	I	6	23	3	49
SM201437	Zunyi	2014	S.Enteritidis	>32	R	>32/16	R	≤0.25	S	≤1	S	≤1	S	>32	R	≤1	S	>512	R	0.25/4.75	S	>32	R	0.125	I	4	S	≤0.5	S	4	S	4	S	16	I	5	20	6	44
SM201439	Zunyi	2014	S.Enteritidis	>32	R	>32/16	R	≤0.25	S	≤1	S	2	S	>32	R	32	R	>512	R	>4/76	R	>32	R	0.5	I	8	S	≤0.5	S	32	R	32	R	>64	R	7	20	6	44
SM201440	Zunyi	2014	S.Enteritidis	>32	R	>32/16	R	≤0.25	S	≤1	S	2	S	>32	R	≤1	S	>512	R	>4/76	R	>32	R	0.125	I	4	S	≤0.5	S	>32	R	32	R	16	I	6	6	5	6
SM201442	Guiyang	2014	S.Enteritidis	>32	R	>32/16	R	≤0.25	S	≤1	S	2	S	>32	R	≤1	S	>512	R	>4/76	R	>32	R	0.125	I	≤2	S	≤0.5	S	2	S	4	S	8	S	5	6	3	7
SM201443	Qianxinan	2014	S.Enteritidis	>32	R	>32/16	R	≤0.25	S	≤1	S	≤1	S	>32	R	≤1	S	>512	R	>4/76	R	>32	R	0.125	I	≤2	S	≤0.5	S	32	R	8	I	8	S	6	9	5	16
SM201444	Qianxinan	2014	S.Enteritidis	>32	R	>32/16	R	≤0.25	S	≤1	S	2	S	>32	R	≤1	S	512	R	>4/76	R	>32	R	0.125	I	4	S	≤0.5	S	2	S	≤2	S	8	S	5	9	6	17
SM201510	Anshun	2015	S.Enteritidis	2	S	2/1	S	≤0.25	S	≤1	S	4	S	32	R	≤1	S	>512	R	≤0.13/2.4	S	>32	R	0.06	S	≤2	S	≤0.5	S	2	S	4	S	8	S	3	32	6	59
SM201511	Anshun	2015	S.Enteritidis	>32	R	>32/16	R	≤0.25	S	≤1	S	2	S	>32	R	≤1	S	>512	R	0.25/4.75	S	>32	R	0.125	I	≤2	S	≤0.5	S	32	R	32	R	16	I	6	29	3	55
SM201512	Anshun	2015	S.Enteritidis	>32	R	>32/16	R	>8	R	16	R	2	S	32	R	≤1	S	>512	R	≤0.13/2.4	S	>32	R	0.125	I	≤2	S	≤0.5	S	4	S	4	S	16	I	6	30	6	56
SM201516	Anshun	2015	S.Enteritidis	>32	R	>32/16	R	≤0.25	S	≤1	S	2	S	>32	R	≤1	S	>512	R	0.25/4.75	S	>32	R	0.25	I	4	S	≤0.5	S	4	S	4	S	16	I	5	20	23	45
SM201521	Tongren	2015	S.Enteritidis	>32	R	>32/16	R	≤0.25	S	≤1	S	2	S	>32	R	≤1	S	>512	R	0.25/4.75	S	>32	R	0.06	S	≤2	S	≤0.5	S	2	S	4	S	8	S	5	8	16	11
SM201523	Qianxinan	2015	S.Enteritidis	>32	R	>32/16	R	8	R	>32	R	2	S	>32	R	≤1	S	>512	R	2/38	S	>32	R	0.25	I	≤2	S	≤0.5	S	32	R	32	R	>64	R	8	28	24	54
SM201532	Tongren	2015	S.Enteritidis	>32	R	>32/16	R	≤0.25	S	≤1	S	4	S	>32	R	≤1	S	>512	R	0.5/9.5	S	>32	R	0.125	I	≤2	S	≤0.5	S	>32	R	32	R	16	I	6	8	14	12
SM201533	Tongren	2015	S.Enteritidis	>32	R	>32/16	R	≤0.25	S	≤1	S	2	S	>32	R	≤1	S	>512	R	0.25/4.75	S	>32	R	0.125	I	≤2	S	≤0.5	S	4	S	≤2	S	16	I	5	8	6	13
SM201534	Qianxinan	2015	S.Enteritidis	>32	R	>32/16	R	≤0.25	S	≤1	S	≤1	S	>32	R	≤1	S	>512	R	0.25/4.75	S	>32	R	0.125	I	≤2	S	≤0.5	S	4	S	4	S	8	S	5	8	19	14
SM201535	Qianxinan	2015	S.Enteritidis	>32	R	>32/16	R	≤0.25	S	≤1	S	2	S	32	R	≤1	S	>512	R	>4/76	R	>32	R	0.125	I	≤2	S	≤0.5	S	>32	R	32	R	16	I	6	19	19	40
SM201536	Qianxinan	2015	S.Enteritidis	4	S	2/1	S	≤0.25	S	≤1	S	4	S	≤8	S	≤1	S	>512	R	≤0.13/2.4	S	>32	R	0.06	S	≤2	S	≤0.5	S	4	S	4	S	8	S	2	6	25	8
SM201537	Tongren	2015	S.Enteritidis	>32	R	>32/16	R	≤0.25	S	≤1	S	4	S	>32	R	≤1	S	>512	R	0.25/4.75	S	>32	R	0.125	I	4	S	≤0.5	S	4	S	4	S	16	I	5	8	18	15
SM201604	Guiyang	2016	S.Enteritidis	>32	R	>32/16	R	≤0.25	S	≤1	S	≤1	S	>32	R	≤1	S	>512	R	0.25/4.75	S	>32	R	0.125	I	≤2	S	≤0.5	S	2	S	4	S	16	I	5	8	19	14
SM201605	Guiyang	2016	S.Enteritidis	2	S	≤1/0.5	S	≤0.25	S	≤1	S	2	S	≤8	S	≤1	S	>512	R	≤0.13/2.4	S	4	S	≤0.03	S	≤2	S	≤0.5	S	2	S	4	S	16	I	1	11	6	19
SM201608	Guiyang	2016	S.Enteritidis	>32	R	>32/16	R	>8	R	>32	R	1	S	≤8	S	≤1	S	>512	R	≤0.13/2.4	S	>32	R	0.125	I	≤2	S	>16	R	4	S	4	S	16	I	6	6	5	6
SM201619	Qiannan	2016	S.Enteritidis	>32	R	8	S	≤0.25	S	≤1	S	≤1	S	>32	R	≤1	S	>512	R	0.5/9.5	S	>32	R	0.125	I	4	S	≤0.5	S	2	S	≤2	S	4	S	3	18	6	35
SM201620	Tongren	2016	S.Enteritidis	≤1	S	≤1	S	≤0.25	S	≤1	S	≤1	S	≤8	S	≤1	S	512	R	≤0.13/2.4	S	>32	R	0.25	I	4	S	≤0.5	S	4	S	≤2	S	4	S	2	7	6	10
SM201621	Anshun	2016	S.Enteritidis	>32	R	16	I	≤0.25	S	≤1	S	≤1	S	>32	R	≤1	S	>512	R	0.25	S	>32	R	0.125	I	4	S	≤0.5	S	2	S	≤2	S	4	S	4	10	9	18
SM201622	Tongren	2016	S.Enteritidis	>32	R	8	S	>8	R	≤1	S	≤1	S	>32	R	>32	R	>512	R	>4	R	>32	R	>4	R	>64	R	≤0.5	S	4	S	>32	R	4	S	7	5	9	5
SM201628	Qianxinan	2016	S.Enteritidis	≤1	S	≤1	S	≤0.25	S	≤1	S	≤1	S	≤8	S	≤1	S	32	S	≤0.13/2.4	S	>32	R	0.125	I	≤2	S	≤0.5	S	2	S	≤2	S	4	S	1	19	17	41
SM201630	Qianxinan	2016	S.Enteritidis	>32	R	8	S	≤0.25	S	≤1	S	≤1	S	>32	R	≤1	S	>512	R	0.25	S	>32	R	0.125	I	≤2	S	≤0.5	S	2	S	≤2	S	4	S	4	12	13	20
SM201631	Qianxinan	2016	S.Enteritidis	>32	R	8	S	≤0.25	S	≤1	S	2	S	>32	R	≤1	S	>512	R	0.25	S	>32	R	0.125	I	4	S	≤0.5	S	2	S	≤2	S	4	S	4	12	5	21
SM201639	Qiannan	2016	S.Enteritidis	≤1	S	≤1	S	≤0.25	S	≤1	S	≤1	S	≤8	S	≤1	S	≤16	S	≤0.13/2.4	S	>32	R	0.06	S	≤2	S	≤0.5	S	2	S	≤2	S	4	S	1	33	6	60
SM201642	Bijie	2016	S.Enteritidis	>32	R	2	S	>8	R	>32	R	≤1	S	>32	R	≤1	S	>512	R	0.25	S	>32	R	0.125	I	4	S	≤0.5	S	32	R	>32	R	4	S	6	24	10	50
SM201648	Bijie	2016	S.Enteritidis	>32	R	8	S	≤0.25	S	≤1	S	2	S	>32	R	≤1	S	>512	R	0.25/4.75	S	>32	R	0.125	I	4	S	1	S	2	S	≤2	S	4	S	4	21	6	47
SM201650	Guiyang	2016	S.Enteritidis	>32	R	8	S	≤0.25	S	≤1	S	≤1	S	>32	R	≤1	S	>512	R	0.25/4.75	S	>32	R	0.125	I	4	S	1	S	2	S	≤2	S	4	S	4	18	5	33
SM201651	Zunyi	2016	S.Enteritidis	>32	R	8	S	≤0.25	S	≤1	S	≤1	S	>32	R	≤1	S	>512	R	0.25/4.75	S	>32	R	0.125	I	4	S	≤0.5	S	2	S	≤2	S	4	S	4	20	15	46
SM201652	Zunyi	2016	S.Enteritidis	>32	R	8	S	≤0.25	S	≤1	S	≤1	S	>32	R	≤1	S	>512	R	>4	R	>32	R	0.5	I	16	S	≤0.5	S	32	R	>32	R	4	S	5	18	5	33
SM201653	Zunyi	2016	S.Enteritidis	>32	R	8	S	≤0.25	S	≤1	S	2	S	>32	R	≤1	S	>512	R	0.25/4.75	S	>32	R	0.25	I	4	S	1	S	2	S	≤2	S	8	S	4	18	5	33
SM201655	Zunyi	2016	S.Enteritidis	>32	R	8	S	≤0.25	S	≤1	S	≤1	S	>32	R	32	R	>512	R	>4	R	>32	R	0.5	I	64	R	1	S	16	R	>32	R	8	S	6	18	5	33
SM201656	Zunyi	2016	S.Enteritidis	>32	R	8	S	≤0.25	S	≤1	S	4	S	>32	R	≤1	S	>512	R	0.25/4.75	S	>32	R	0.25	I	4	S	≤0.5	S	2	S	≤2	S	8	S	4	18	5	33
SM201657	Zunyi	2016	S.Enteritidis	>32	R	16	I	≤0.25	S	≤1	S	4	S	>32	R	32	R	>512	R	>4	R	>32	R	0.5	I	64	R	≤0.5	S	16	R	>32	R	8	S	6	18	6	35
SM201661	Zunyi	2016	S.Enteritidis	>32	R	8	S	≤0.25	S	≤1	S	≤1	S	>32	R	≤1	S	>512	R	0.25/4.75	S	>32	R	0.125	I	≤2	S	≤0.5	S	2	S	≤2	S	4	S	4	18	14	36
SM201664	Zunyi	2016	S.Enteritidis	>32	R	4	S	≤0.25	S	≤1	S	4	S	>32	R	≤1	S	512	R	≤0.13/2.4	S	>32	R	0.125	I	≤2	S	≤0.5	S	32	R	>32	R	≤2	S	5	12	5	21
SM201669	Zunyi	2016	S.Enteritidis	≤1	S	≤1	S	≤0.25	S	≤1	S	≤1	S	≤8	S	≤1	S	≤16	S	≤0.13/2.4	S	>32	R	0.125	I	≤2	S	≤0.5	S	2	S	≤2	S	≤2	S	1	13	4	26
SM201671	Zunyi	2016	S.Enteritidis	≤1	S	≤1	S	≤0.25	S	≤1	S	≤1	S	≤8	S	≤1	S	≤16	S	≤0.13/2.4	S	>32	R	0.125	I	≤2	S	≤0.5	S	2	S	≤2	S	4	S	1	17	12	31
SM201672	Zunyi	2016	S.Enteritidis	>32	R	8	S	≤0.25	S	≤1	S	≤1	S	>32	R	≤1	S	>512	R	0.25/4.75	S	>32	R	0.125	I	≤2	S	≤0.5	S	>32	R	>32	R	4	S	5	17	19	32
SM201673	Zunyi	2016	S.Enteritidis	>32	R	8	S	≤0.25	S	≤1	S	≤1	S	>32	R	≤1	S	>512	R	0.25/4.75	S	>32	R	0.125	I	≤2	S	≤0.5	S	2	S	≤2	S	4	S	4	25	15	51
SM201675	Zunyi	2016	S.Enteritidis	>32	R	8	S	≤0.25	S	≤1	S	8	S	>32	R	≤1	S	>512	R	≤0.13/2.4	S	>32	R	0.25	I	≤2	S	≤0.5	S	2	S	≤2	S	4	S	4	18	2	37
